# Supplementary material
Source: PubMed Central journal article supplement (PMC4730580)
Supplement: IAI.00711-15_zii002161581so1.pdf [file IAI.00711-15_zii002161581so1.pdf]

## Supplemental Material

### Supplemental Figures

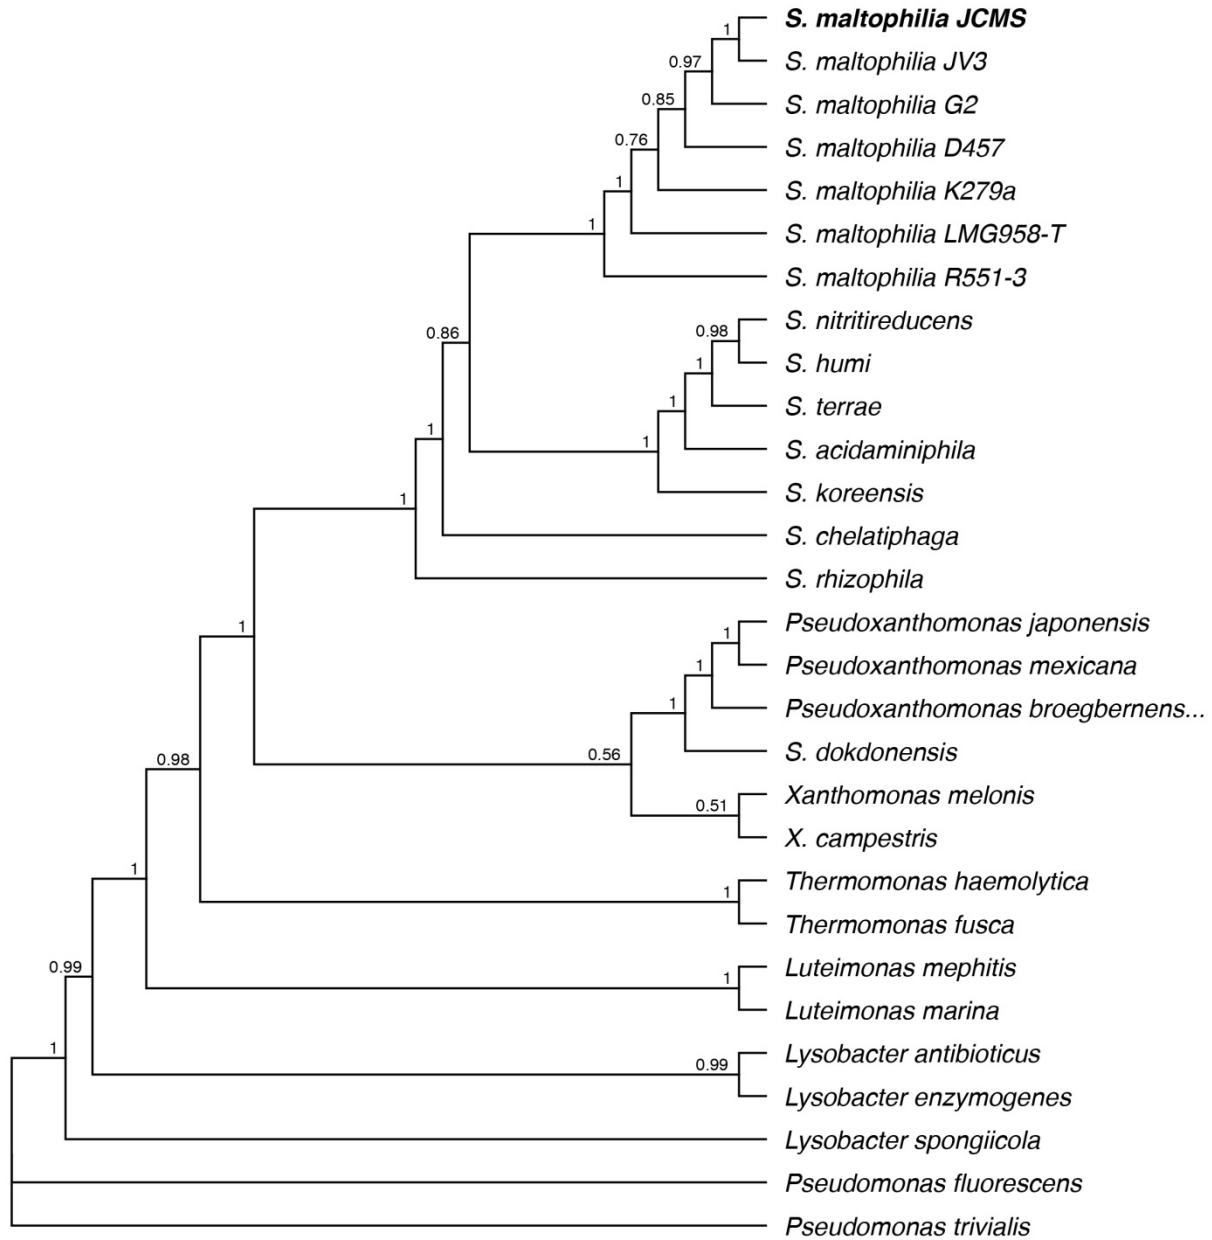

**Figure S1. Bayesian phylogenetic tree of bacterial 16S rRNA gene sequences.**

Sequences included JCMS (KF724885), K279a, R551-3, JV3 (CP002986), G2

(EU927145) and those included in a previous study (1). *S. maltophilia* JCMS, R551-3

and K279a were involved in this study. Alignments and phylogenetic trees were generated using packages contained within the Geneious software package (Biomatters, Inc.). Full-length 16S rRNA sequences were aligned with ClustalW, and phylogenetic trees generated using MrBays (v.3.1.2.) (2) using default MrBayes parameters implemented within Geneious. We used a HKY85 sequence substitution model with a 4 category gamma-distributed rate variation across sites with *Pseudomonas fluorescens* as the out-group. The MCMC length was 1,100,000 with sampling every 200 generations using 4 heated chains. Posterior probabilities are indicated and branch lengths are proportional. JCMS is more closely related to K279a than to R551-3.

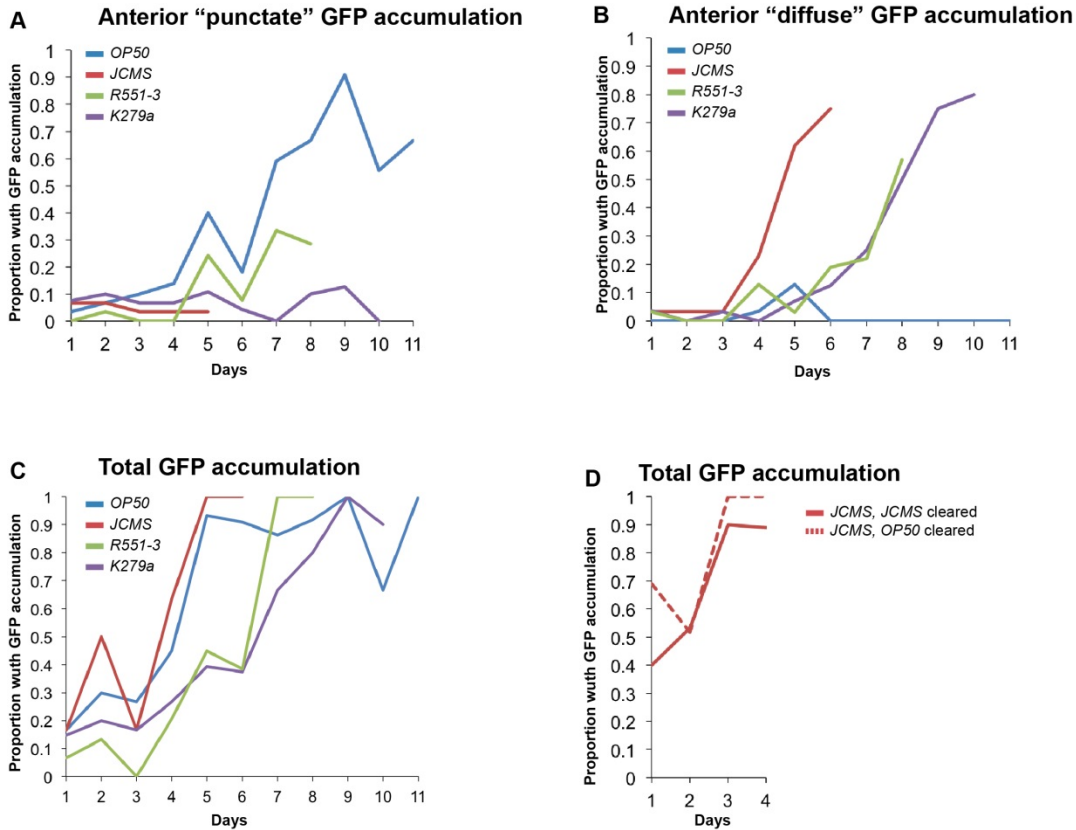

**Figure S2. *S. maltophilia* JCMS accumulates in the intestine in a diffuse pattern.**

Nematodes were fed GFP versions of the various *S. maltophilia* strains. Intestinal accumulation of GFP-labeled bacteria was scored. Proportion of surviving nematodes after 1 hour of clearing on non-GFP bacteria of the same strain with (A) punctate GFP accumulation in the anterior portion of the intestine, (B) diffuse GFP accumulation in the anterior portion of the intestine and (C) total (anterior, middle and posterior) GFP accumulation for day 1 through 11. N = 153 for *S. maltophilia* JCMS, 189 for *S. maltophilia* R551-3, 209 for *S. maltophilia* K279a and 228 for *E. coli* OP50. D) Proportion of surviving nematodes fed JCMS-GFP after 1 hour of clearing on non-GFP OP50 (dashed line) and JCMS (solid line) with total GFP accumulation for day 1 - 4. N =

112 for clearing on OP50 and 117 for clearing on JCMS. *S. maltophilia* JCMS accumulated in the intestine to a greater extent when competing with *E. coli* OP50.

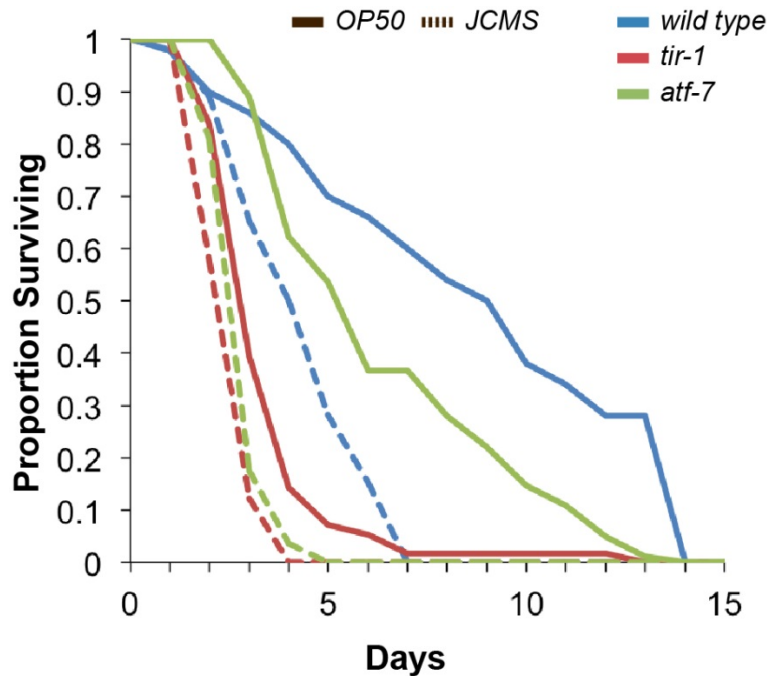

**Figure S3. Survival of select p38 MAPK immune pathway mutants.**

Survival of wild-type nematodes (WT, blue) and *tir-1(qd4)* (red) and *atf-7(qd137)* (green) mutants on *E. coli* OP50 (solid lines) and *S. maltophilia* JCMS (dashed lines). Results plotted are the proportion of surviving nematodes using Kaplan-Meier estimates generated in R for at least three replicate samples of 10 to 15 nematodes. Sample sizes and p values from the application of Cox proportional hazards models are included in Table 1. Survival of *tir-1* and *atf-7* mutants was significantly shorter than wild type on JCMS and OP50.

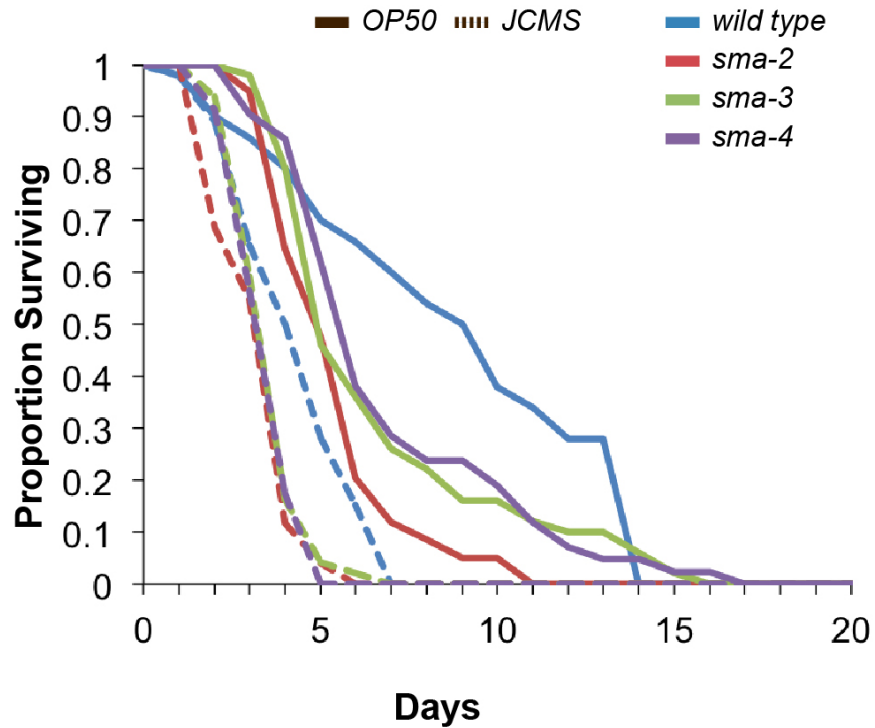

**Figure S4. Survival of select TGF $\beta$ -like immune pathway mutants.**

Survival of wild-type nematodes (WT, blue) and *sma-2*(e502) (red), *sma-3*(e491) (green) and *sma-4*(e729) (purple) mutants on *E. coli* OP50 (solid lines) and *S. maltophilia* JCMS (dashed lines). Results plotted are the proportion of surviving nematodes using Kaplan-Meier estimates generated in R for at least three replicate samples of 10 to 15 nematodes. Sample sizes and p values from the application of Cox proportional hazards models are included in Table 1. Survival of *sma-2*, *sma-3* and *sma-4* mutants was significantly shorter than wild type on JCMS and OP50.

## Supplemental Tables

**Table S1. Survival of nematodes fed *E. coli*, *P. aeruginosa*, *E. faecalis* and *S. maltophilia* strains<sup>a</sup>**

| Control       | Mean <sup>b</sup> | SE    | N <sup>c</sup> | Treatment     | Mean <sup>b</sup> | SE     | N <sup>c</sup> | Hazard ratio | p value <sup>d</sup> |
|---------------|-------------------|-------|----------------|---------------|-------------------|--------|----------------|--------------|----------------------|
| <b>OP50</b>   | 8.53              | 0.187 | 243            | <b>JCMS</b>   | 4.69              | 0.0884 | 150            | 8.62         | <2E-16               |
| <b>OP50</b>   | 8.53              | 0.187 | 243            | <b>R551-3</b> | 6.73              | 0.294  | 49             | 2.27         | 4.7E-07              |
| <b>OP50</b>   | 8.53              | 0.187 | 243            | <b>K279a</b>  | 9.17              | 0.536  | 49             | 0.772        | 0.106                |
| <b>K279a</b>  | 9.17              | 0.536 | 49             | <b>JCMS</b>   | 4.69              | 0.0884 | 150            | 9.83         | <2E-16               |
| <b>R551-3</b> | 6.73              | 0.294 | 49             | <b>JCMS</b>   | 4.69              | 0.0884 | 150            | 4.11         | 6.1E-13              |
| <b>V583</b>   | 4.11              | 0.181 | 63             | <b>JCMS</b>   | 4.69              | 0.0884 | 150            | 0.752        | 0.0663               |
| <b>PA14</b>   | 3.68              | 0.134 | 73             | <b>JCMS</b>   | 4.69              | 0.0884 | 150            | 0.494        | 1.2E-06              |
| <b>PA14</b>   | 3.68              | 0.134 | 73             | <b>K279a</b>  | 9.17              | 0.536  | 49             | 0.0511       | 1.1E-14              |

<sup>a</sup> Control and treatment bacteria: *P. aeruginosa* PA14, *E. coli* OP50, *E. faecalis* V583, *S.*

*maltophilia* JCMS, K279a and R551-3. <sup>b</sup> Mean survival in days. <sup>c</sup> Number of nematodes

tested. <sup>d</sup> P values of < 0.05 were considered significant and are given for the survival

predictor of bacterial treatment for Cox proportional hazards models in R.

**Table S2. Effect of different media on the survival of nematodes fed *S. maltophilia* strains and *P. aeruginosa* PA14<sup>a</sup>**

| Control           | Mean <sup>b</sup> | SE     | N <sup>c</sup> | Treatment         | Mean <sup>b</sup> | SE    | N <sup>c</sup> | Hazard ratio | p value <sup>d</sup> |
|-------------------|-------------------|--------|----------------|-------------------|-------------------|-------|----------------|--------------|----------------------|
| <b>PA14 NGM</b>   | 3.68              | 0.13   | 73             | <b>PA14 PGS</b>   | 2.88              | 0.266 | 43             | 2.09         | 0.00154*             |
| <b>JCMS NGM</b>   | 4.69              | 0.0884 | 150            | <b>JCMS PGS</b>   | 5.6               | 0.358 | 30             | 0.442        | 0.00016              |
| <b>JCMS NGM</b>   | 4.69              | 0.0884 | 150            | <b>JCMS BHI</b>   | 5.71              | 0.305 | 29             | 0.389        | 1.86E-5              |
| <b>K279a NGM</b>  | 9.17              | 0.536  | 49             | <b>K279a PGS</b>  | 5.63              | 0.26  | 55             | 2.76         | 3.44E-6              |
| <b>K279a NGM</b>  | 9.17              | 0.536  | 49             | <b>K279a BHI</b>  | 5.76              | 0.304 | 54             | 3.18         | 5.2E-7               |
| <b>R551-3 NGM</b> | 6.7               | 0.27   | 47             | <b>R551-3 PGS</b> | 5.4               | 0.44  | 28             | 1.48         | 0.103                |
| <b>R551-3 NGM</b> | 6.7               | 0.27   | 47             | <b>R551-3 BHI</b> | 4.3               | 0.25  | 29             | 4.17         | 1.17E-07             |
| <b>OP50 NGM</b>   | 8.31              | 0.164  | 240            | <b>OP50 PGS</b>   | 5.1               | 0.35  | 27             | 4.65         | 8.8E-13              |
| <b>OP50 NGM</b>   | 8.31              | 0.164  | 240            | <b>OP50 BHI</b>   | 6.6               | 0.18  | 25             | 2.87         | 2.4E-06              |
| <b>PA14 PGS</b>   | 2.88              | 0.266  | 43             | <b>K279a PGS</b>  | 5.63              | 0.26  | 55             | 0.215        | 1.7E-9               |
| <b>PA14 PGS</b>   | 2.88              | 0.266  | 43             | <b>JCMS PGS</b>   | 5.6               | 0.358 | 30             | 0.175        | 1.1E-7               |

<sup>a</sup> Control and treatment bacteria: *P. aeruginosa* PA14, *E. coli* OP50, *S. maltophilia*

JCMS, K279a and R551-3. Control and treatment growth medium: NGM = nematode

growth medium, BHI = brain heart infusion medium (enriched media) and PGS =

peptone-glucose-sorbitol (fast killing media). <sup>b</sup> Mean survival in days. <sup>c</sup> Number of

nematodes tested. <sup>d</sup> P values of < 0.05 were considered significant and are given for the

survival predictor of bacterial treatment for Cox proportional hazards models in R. \* Date

of experimentation was observed to have a significant effect and was included in this

model.



**Table S3. Survival of nematodes fed non-GFP *E. coli*, *S. maltophilia* versus GFP strains<sup>a</sup>**

| Control       | Mean <sup>b</sup> | SE    | N <sup>c</sup> | Treatment         | Mean <sup>b</sup> | SE    | N <sup>c</sup> | Hazard ratio | p value <sup>d</sup> |
|---------------|-------------------|-------|----------------|-------------------|-------------------|-------|----------------|--------------|----------------------|
| <b>JCMS</b>   | 4.94              | 0.15  | 50             | <b>JCMS GFP</b>   | 4.88              | 0.135 | 50             | 1.23         | 0.318                |
| <b>R551-3</b> | 6.62              | 0.357 | 52             | <b>R551-3 GFP</b> | 6.82              | 0.323 | 44             | 0.95         | 0.805                |
| <b>K279a</b>  | 8.87              | 0.418 | 47             | <b>K279a GFP</b>  | 9.56              | 0.47  | 45             | 0.777        | 0.23                 |
| <b>OP50</b>   | 8.82              | 0.343 | 50             | <b>OP50 GFP</b>   | 7.65              | 0.364 | 54             | 1.37         | 0.124                |

<sup>a</sup> Control and treatment bacteria: *E. coli* OP50, *S. maltophilia* JCMS, R551-3 and K279a non-GFP (control) and GFP (treatment). <sup>b</sup> Mean survival in days. <sup>c</sup> Number of nematodes tested. <sup>d</sup> P values of < 0.05 were considered significant and are given for the survival predictor of bacterial treatment for Cox proportional hazards models in R.

**Table S4. Survival of nematodes fed heat and antibiotic treated *E. coli* and *S. maltophilia* versus non-treated strains<sup>a</sup>**

| Control | Mean <sup>b</sup> | SE     | N <sup>c</sup> | Treatment | Mean <sup>b</sup> | SE    | N <sup>c</sup> | Hazard ratio | p value <sup>d</sup> |
|---------|-------------------|--------|----------------|-----------|-------------------|-------|----------------|--------------|----------------------|
| OP50    | 9.16              | 0.47   | 68             | OP50 DT   | 13.9              | 0.688 | 60             | 0.302        | 3.82E-03*            |
| OP50    | 12.8              | 0.746  | 53             | OP50 CT   | 4.9               | 0.484 | 52             | 5.12         | 1.34E-11             |
| OP50    | 9.16              | 0.47   | 68             | OP50 HK   | 7.7               | 0.414 | 61             | 5.1          | 0.000451*            |
| K279a   | 10.7              | 0.369  | 59             | K279a DT  | 16.3              | 0.737 | 62             | 0.0665       | 4.23E-06*            |
| K279a   | 11.9              | 0.54   | 42             | K279a CT  | 15.1              | 0.828 | 54             | 0.21         | 1.92E-08             |
| K279a   | 10.7              | 0.369  | 59             | K279a HK  | 9.25              | 0.532 | 53             | 1.14         | 0.822*               |
| R551-3  | 6.65              | 0.219  | 74             | R551-3 DT | 4.46              | 0.501 | 39             | 4.91         | 5.49E-03*            |
| R551-3  | 9.5               | 0.526  | 45             | R551-3 CT | 11.5              | 0.875 | 54             | 0.46         | 0.0011               |
| R551-3  | 6.65              | 0.219  | 74             | R551-3 HK | 5.79              | 0.372 | 56             | 1.32         | 0.48*                |
| JCMS    | 3.98              | 0.0986 | 60             | JCMS DT   | 11.6              | 0.774 | 62             | 0.113        | 3.01E-05*            |
| JCMS    | 4.7               | 0.134  | 43             | JCMS CT   | 11.5              | 0.542 | 51             | 0.08         | 3.4E-11              |
| JCMS    | 3.98              | 0.0986 | 60             | JCMS HK   | 9.13              | 0.482 | 46             | 0.031        | 3.25E-07*            |

<sup>a</sup> Control and treatment bacteria: Non-treated (control), heat killed (HK), doxycycline treated (DT) and ciprofloxacin treated (CT) (treatment) *E. coli* OP50, *S. maltophilia* JCMS, R551-3 and K279a. <sup>b</sup> Mean survival in days. <sup>c</sup> Number of nematodes tested. <sup>d</sup> P values of < 0.05 were considered significant and are given for the survival predictor of bacterial treatment for Cox proportional hazards models in R. \*Date of experimentation was observed to have a significant effect and was included in this model along with the interaction between treatment and date.

**Table S5. Survival of nematodes fed *E. coli* treated with OP50 secretions versus *S. maltophilia* secretions<sup>a</sup>**

| Control                | Mean <sup>b</sup> | SE    | N <sup>c</sup> | Treatment                | Mean <sup>b</sup> | SE    | N <sup>c</sup> | Hazard ratio | p value <sup>d</sup> |
|------------------------|-------------------|-------|----------------|--------------------------|-------------------|-------|----------------|--------------|----------------------|
| <b>OP50 secretions</b> | 9.01              | 0.601 | 47             | <b>JCMS secretions</b>   | 8.23              | 0.438 | 57             | 0.591        | 0.401                |
| <b>OP50 secretions</b> | 9.01              | 0.601 | 47             | <b>R551-3 secretions</b> | 7.91              | 0.376 | 58             | 0.477        | 0.2296               |
| <b>OP50 secretions</b> | 9.01              | 0.601 | 47             | <b>K279a secretions</b>  | 9.31              | 0.557 | 49             | 0.177        | 0.00905              |

<sup>a</sup> Bacterial secretion control and treatment: *E. coli* OP50 (control), *S. maltophilia* JCMS, R551-3 and K279a (treatment). <sup>b</sup> Mean survival in days. <sup>c</sup> Number of nematodes tested. <sup>d</sup> P values of < 0.05 were considered significant and are given for the survival predictor of bacterial treatment for Cox proportional hazards models (all full factorial models also including date of experimentation) in R.

### Supplemental References

1. Ryan, R. P., Monchy, S., Cardinale, M., Taghavi, S., Crossman, L., Avison, M. B., Berg, G., van der Lelie, D., Dow, J. M. Jul 2009. The versatility and adaptation of bacteria from the genus *Stenotrophomonas*. *Nat Rev Microbiol* 7 (7): 514-525.
2. Huelsenbeck, J. P., Ronquist, F. 1 August 2001. MRBAYES: Bayesian inference of phylogenetic trees. *Bioinformatics* 17 (8): 754-755.
